# Supplementary material
Source: PubMed Central journal article supplement (PMC4373353)
Supplement: NIHMS650931-supplement-1.pdf [file NIHMS650931-supplement-1.pdf]

# Supplemental Figure 1

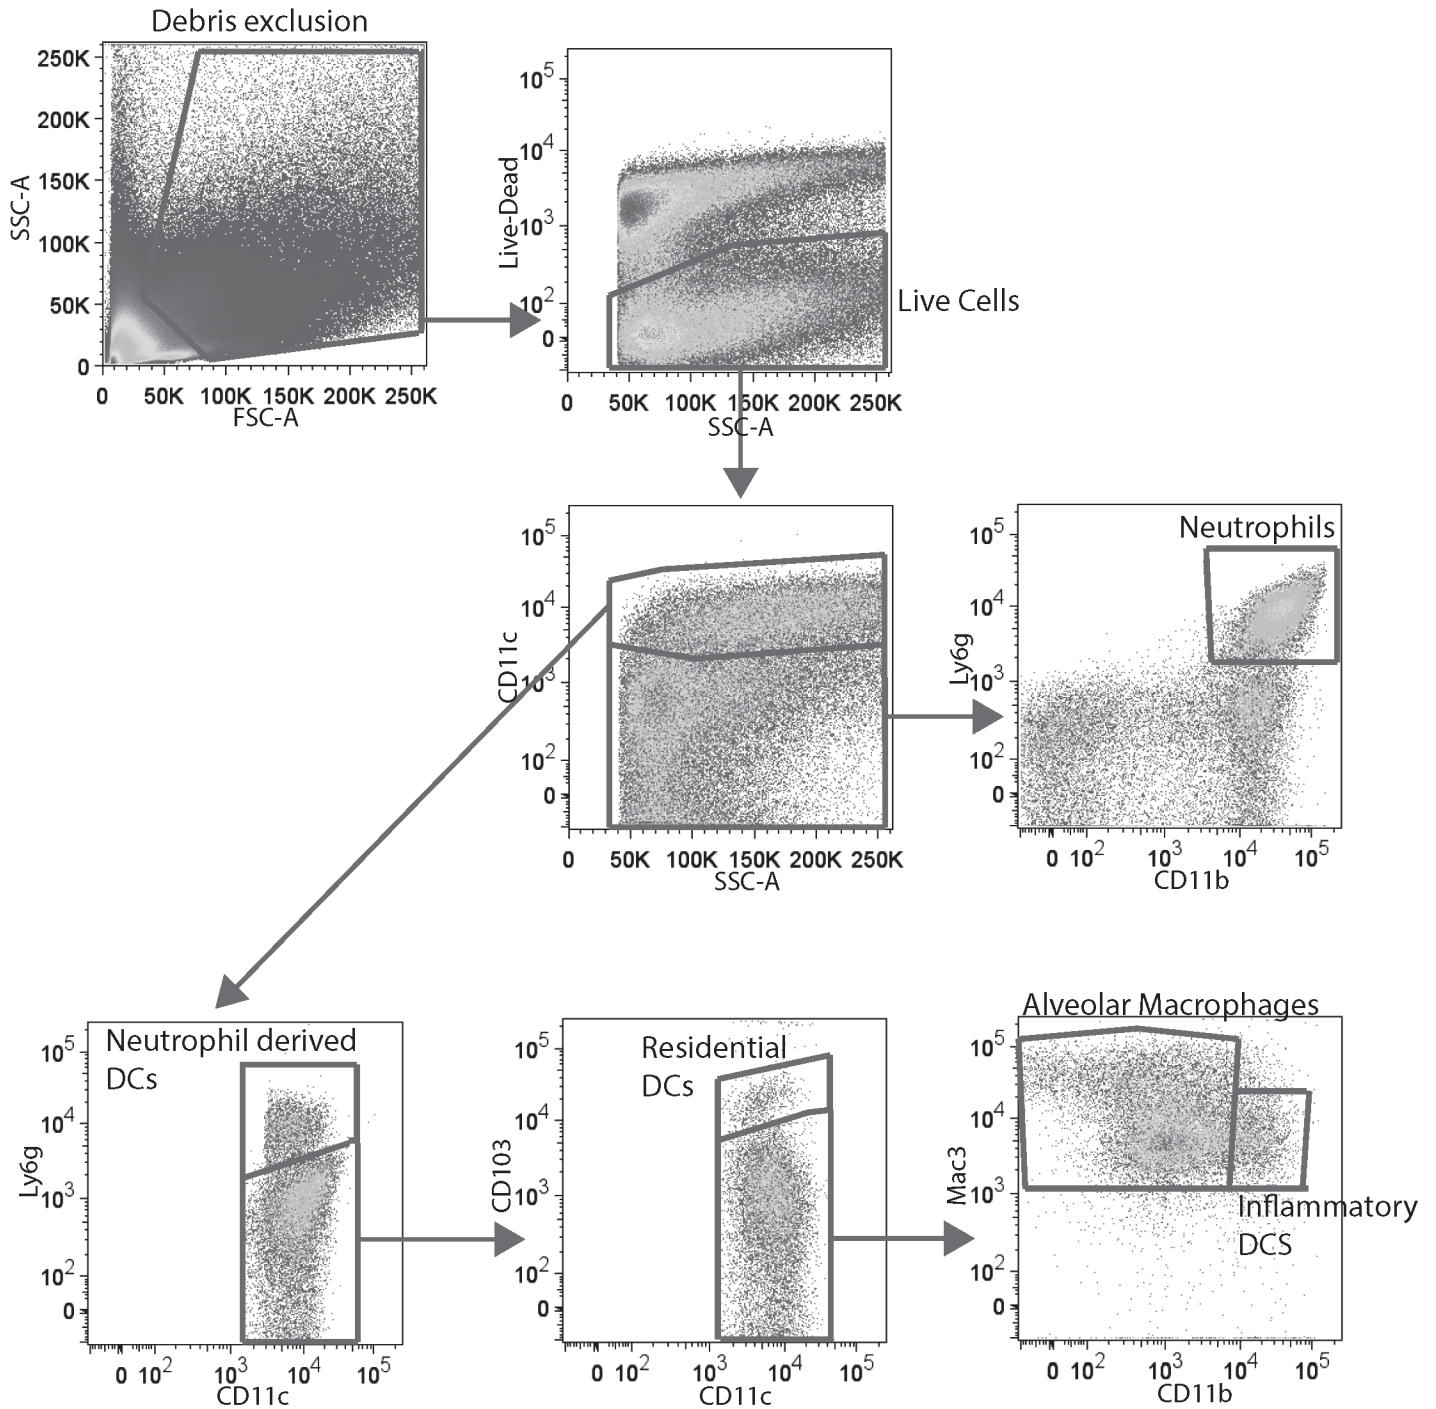

Figure S1. Gating strategy for lung leukocytes. Mice were infected by intubation with 10e4 mCherry 14081 spores. After 3 days, lung leukocytes were analyzed. Debris was excluded on the forward and side scatter and dead cells were excluded based on the uptake of a membrane excludable viability dye. CD11c<sup>+</sup> events were analyzed for Ly6g and CD11b expression to identify neutrophils. CD11c<sup>+</sup> events were analyzed by Ly6g to identify neutrophil derived DCs. The CD11c<sup>+</sup>, Ly6g<sup>-</sup> events were analyzed by CD103 to identify residential DCs. Finally, the CD11c<sup>+</sup>, Ly6g<sup>-</sup>, CD103<sup>-</sup> events were analyzed by Mac-3 and CD11b to identify the alveolar macrophage and inflammatory DCs.
