# Supplementary material
Source: PubMed Central journal article supplement (PMC4373353)
Supplement: NIHMS650931-supplement-2.pdf [file NIHMS650931-supplement-2.pdf]

## **MOVIE LEGEND**

### **Movie 1. Spore transition and replication as yeast within alveolar macrophages.**

The movie shows mCherry 14081 spores cultured for 42 hours with primary alveolar macrophages. Phase contrast images were taken every 15 minutes. Note the budding and replication of *B. dermatitidis* inside of macrophages.
